# Supplementary material
Source: HighWire-hosted journal article supplement (doi:10.1101/rna.077446.120)
Supplement: Supplemental_Information.pdf [file Supplemental_Information.pdf]

**NineTeen Complex-subunit Salsa is required for efficient splicing of a subset of introns and dorsal-ventral patterning.**

Running title: Salsa is required for dorsal-ventral patterning

Om Singh Rathore<sup>1</sup>, Rui D. Silva<sup>1</sup>, Mariana Ascensão-Ferreira<sup>2</sup>, Ricardo Matos<sup>1</sup>, Célia Carvalho<sup>2</sup>, Bruno Marques<sup>1</sup>, Margarida N. Tiago<sup>1</sup>, Pedro Prudêncio<sup>1,2</sup>, Raquel P. Andrade<sup>1,3</sup>, Jean-Yves Roignant<sup>4,5</sup>, Nuno L. Barbosa-Morais<sup>2, \*</sup>, Rui Gonçalo Martinho<sup>1,2,6, \*</sup>

## Supplementary Information

# S1 Figure. Salsa interacts with spliceosome NineTeen Complex (NTC)

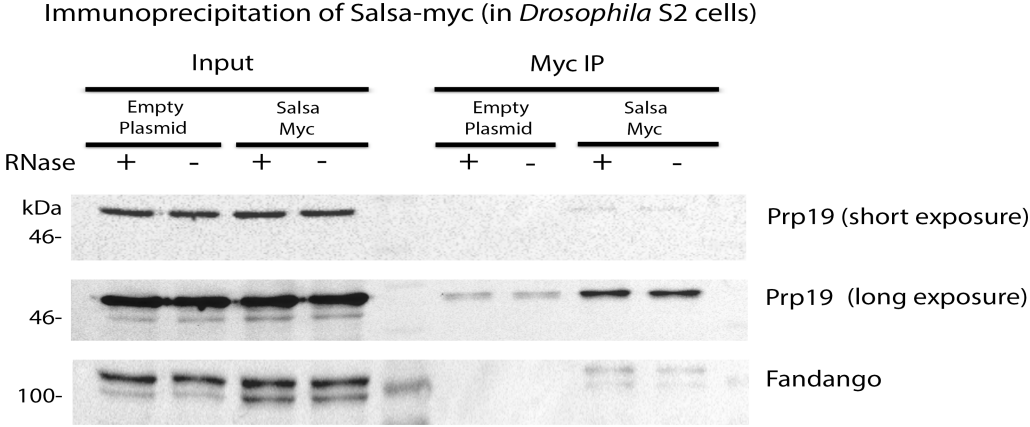

**S2 Figure. The most common form of alternative splicing defects after Salsa depletion is increased levels of intron retention (IR)**

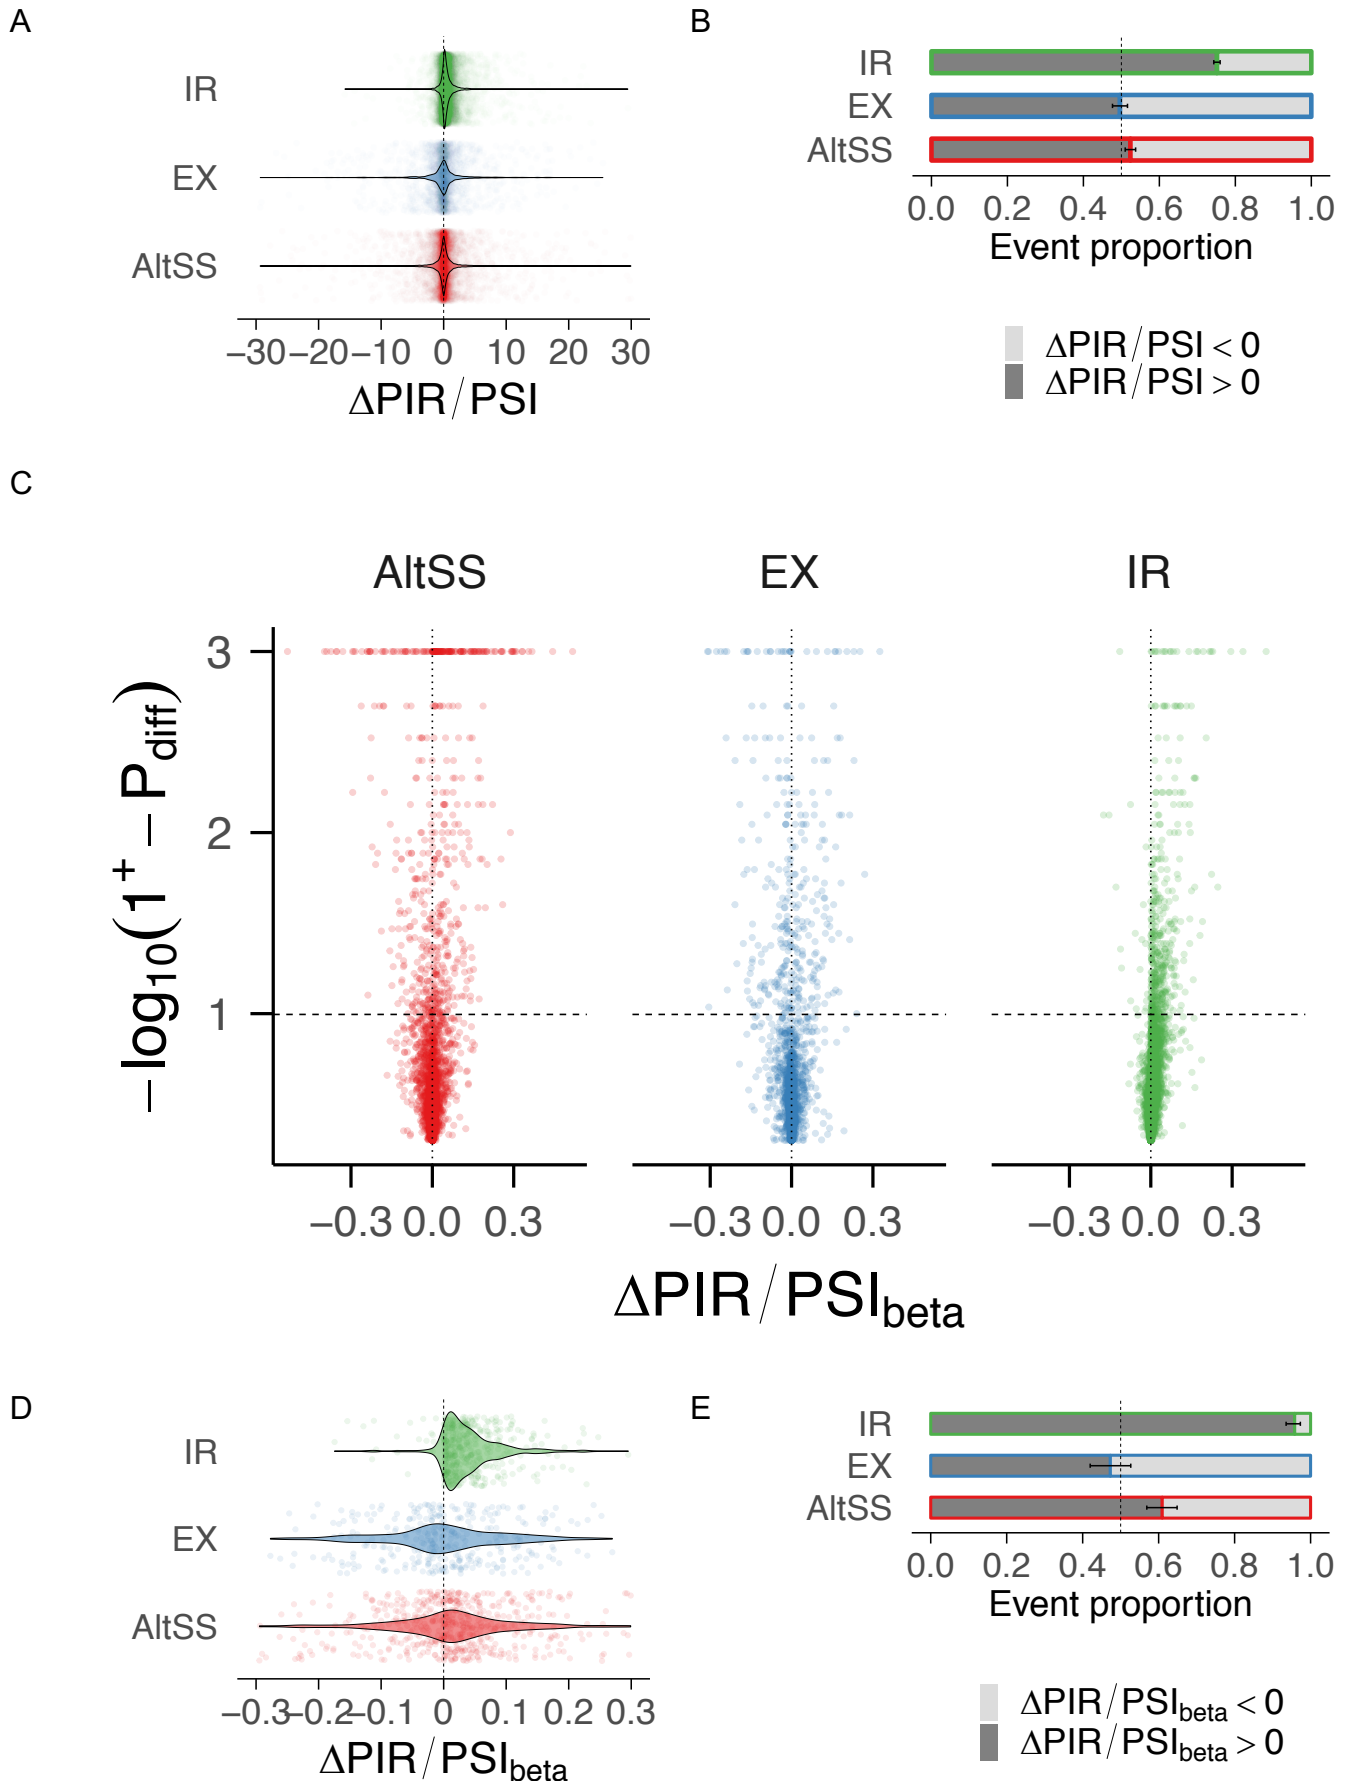

**S3 Figure. A subset of introns shows increased levels of retention (IR) upon Salsa depletion. Salsa is required for splicing of the first intron of *tra2***

A

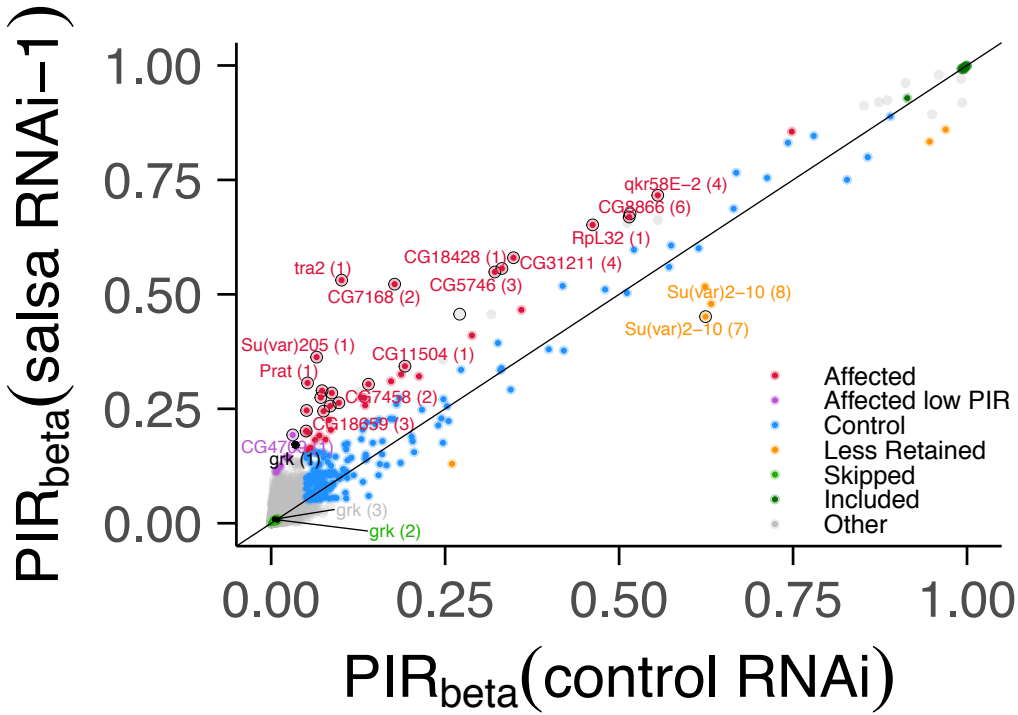

B

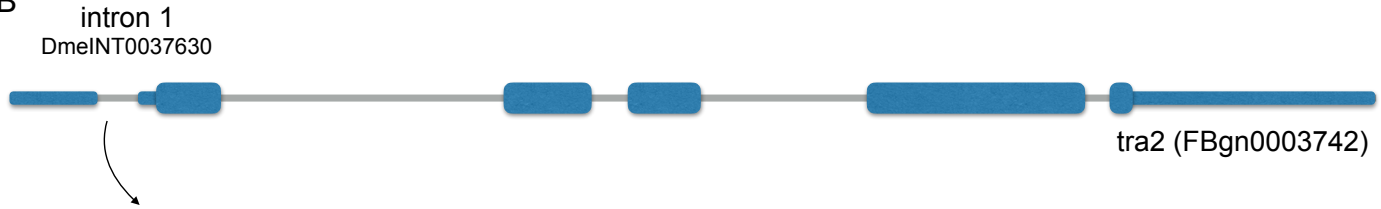

$$\Delta\text{PIR}_{\text{beta}}=0.43, P_{\text{diff}}=1.00$$

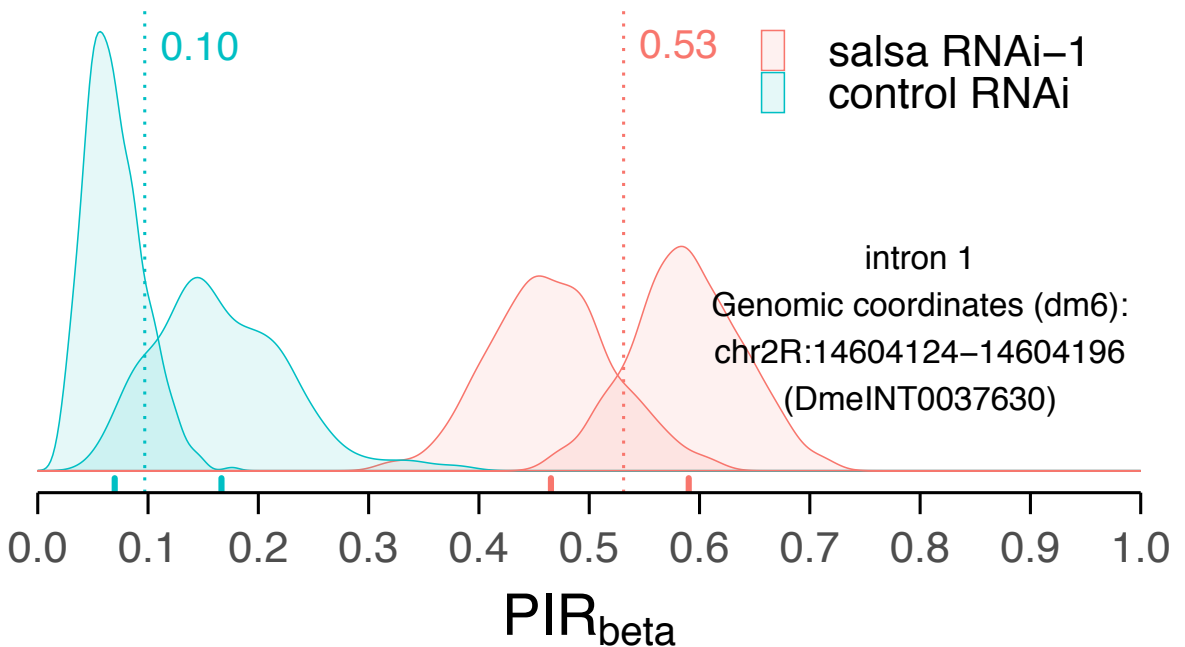



# S5 Figure. Intronic features per intron position when splicing is affected by Salsa depletion

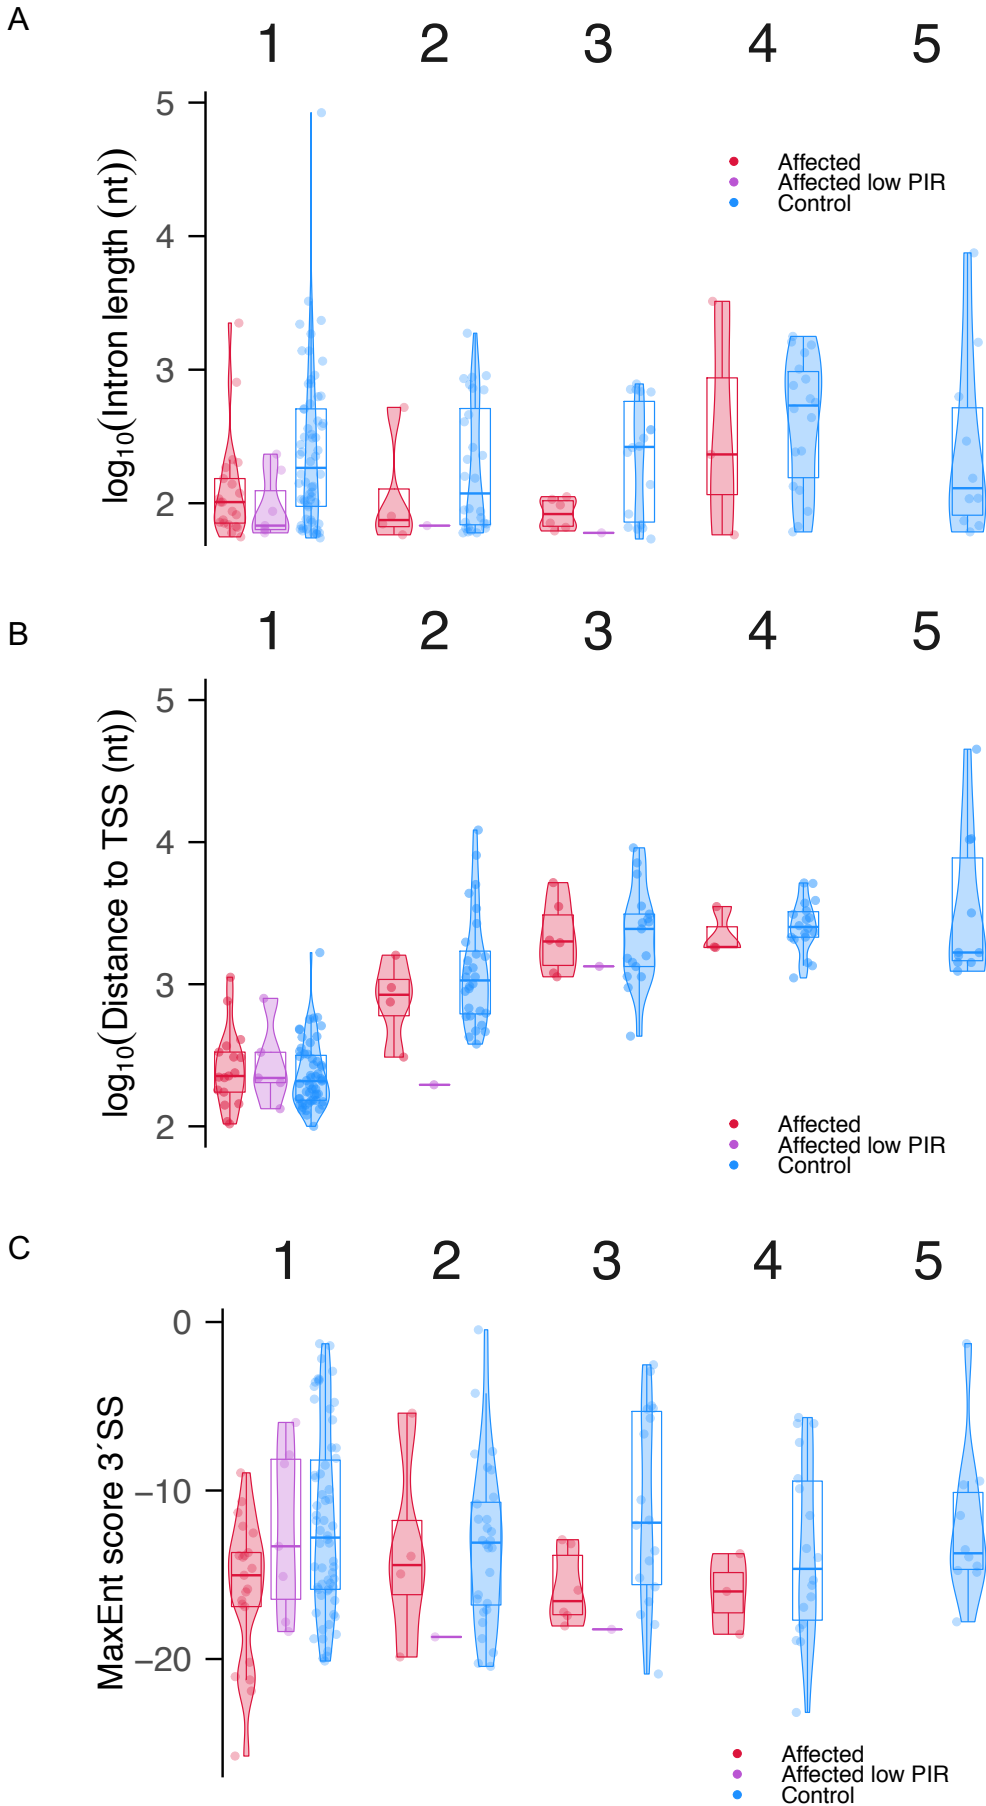

**S6 Figure. No obvious 5' splice site and GC content bias in introns affected by Salsa depletion**

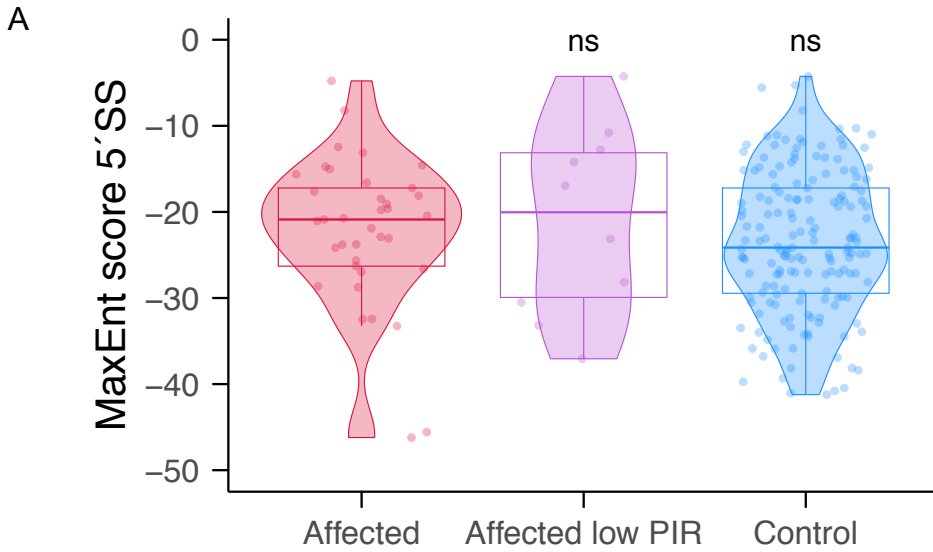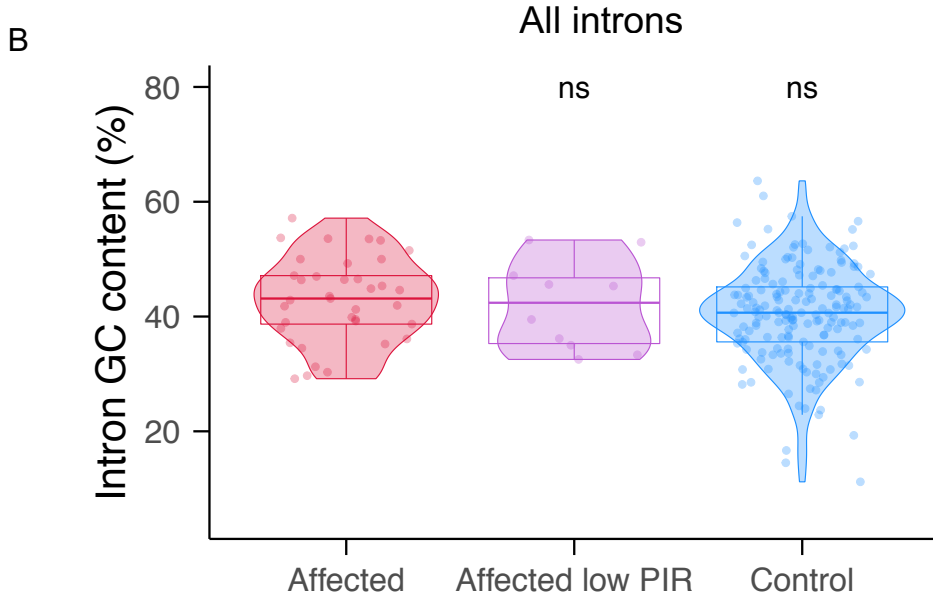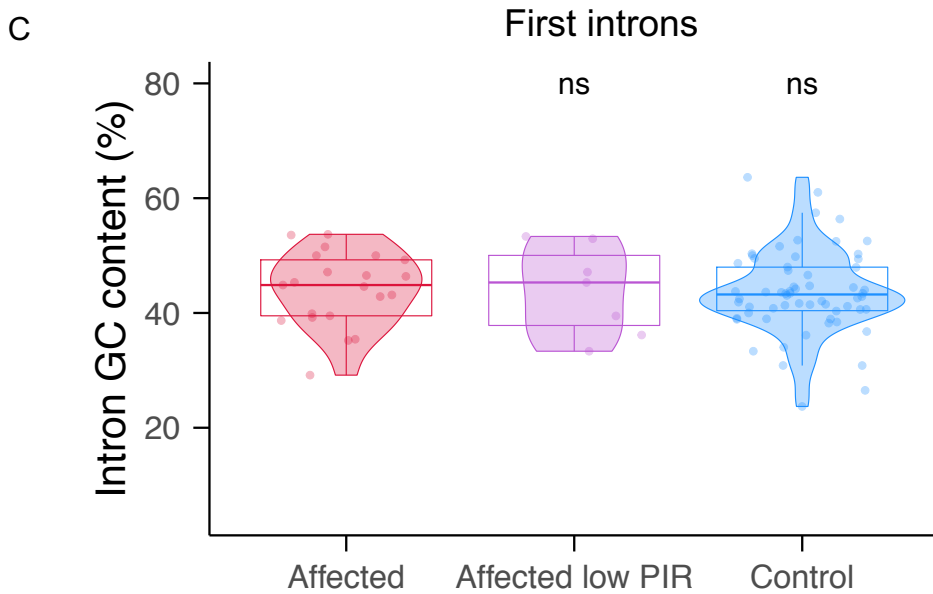

**S7 Figure. Salsa regulates the expression levels of a very small number of genes. Expression of the nonsense-mediated decay pathway genes is unaffected**

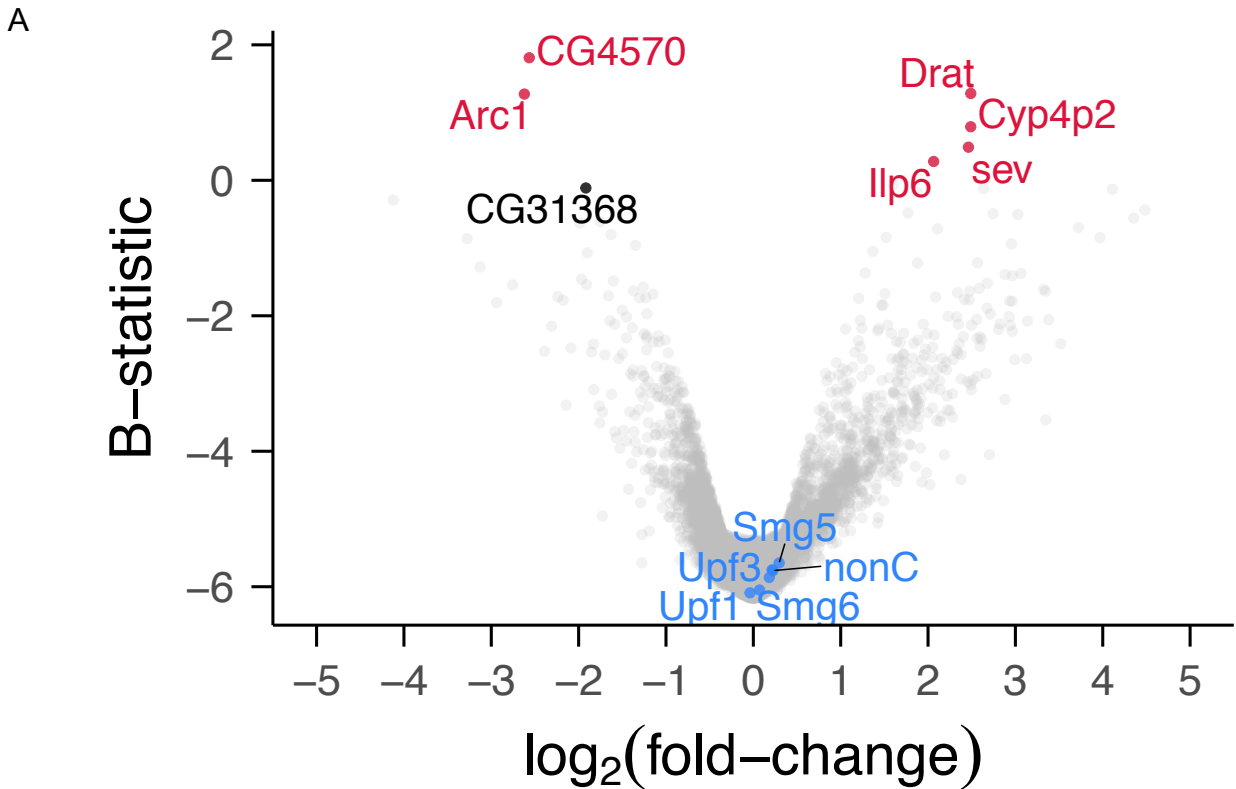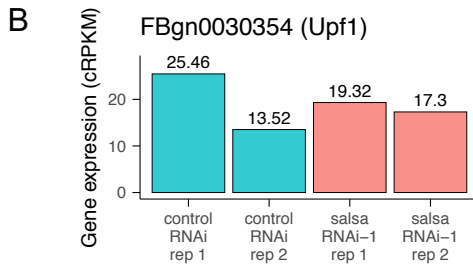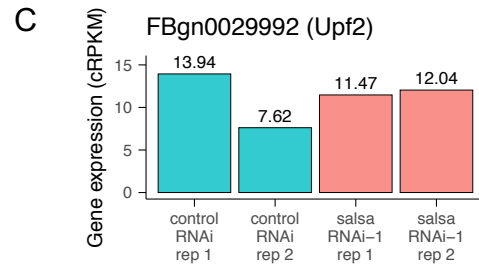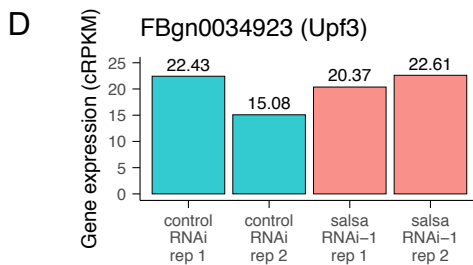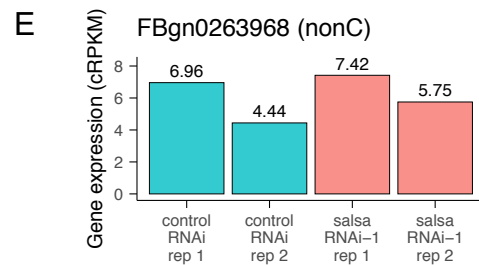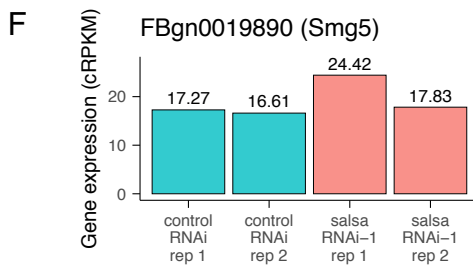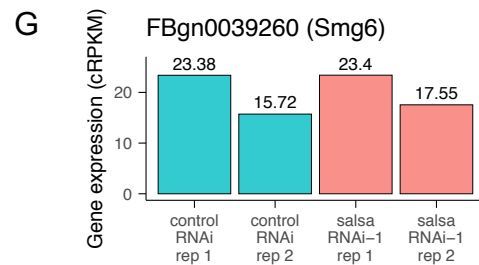

# S8 Figure. Genes whose expression levels were affected by Salsa depletion show no detectable changes in alternative splicing

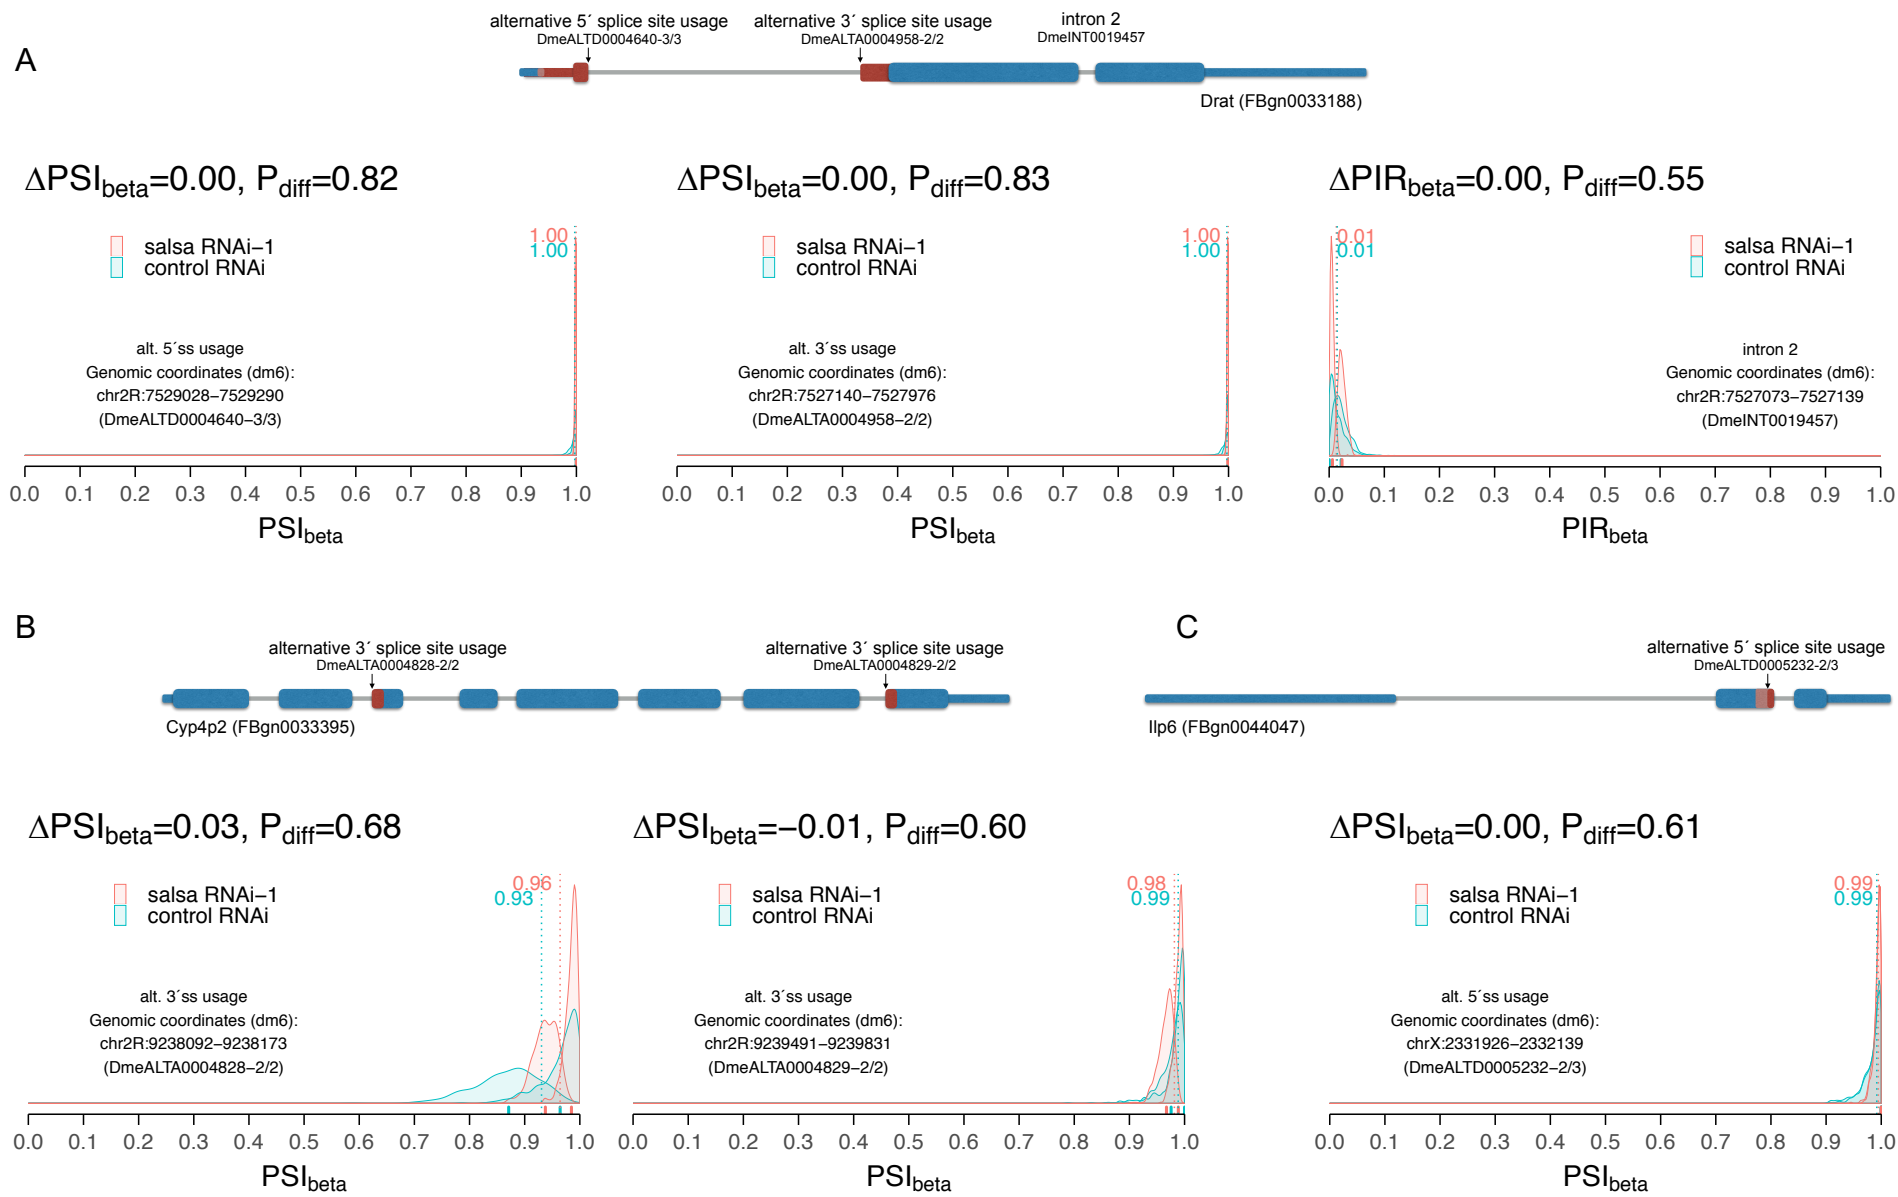



# S10 Figure. Eggshell dorsal appendages defects

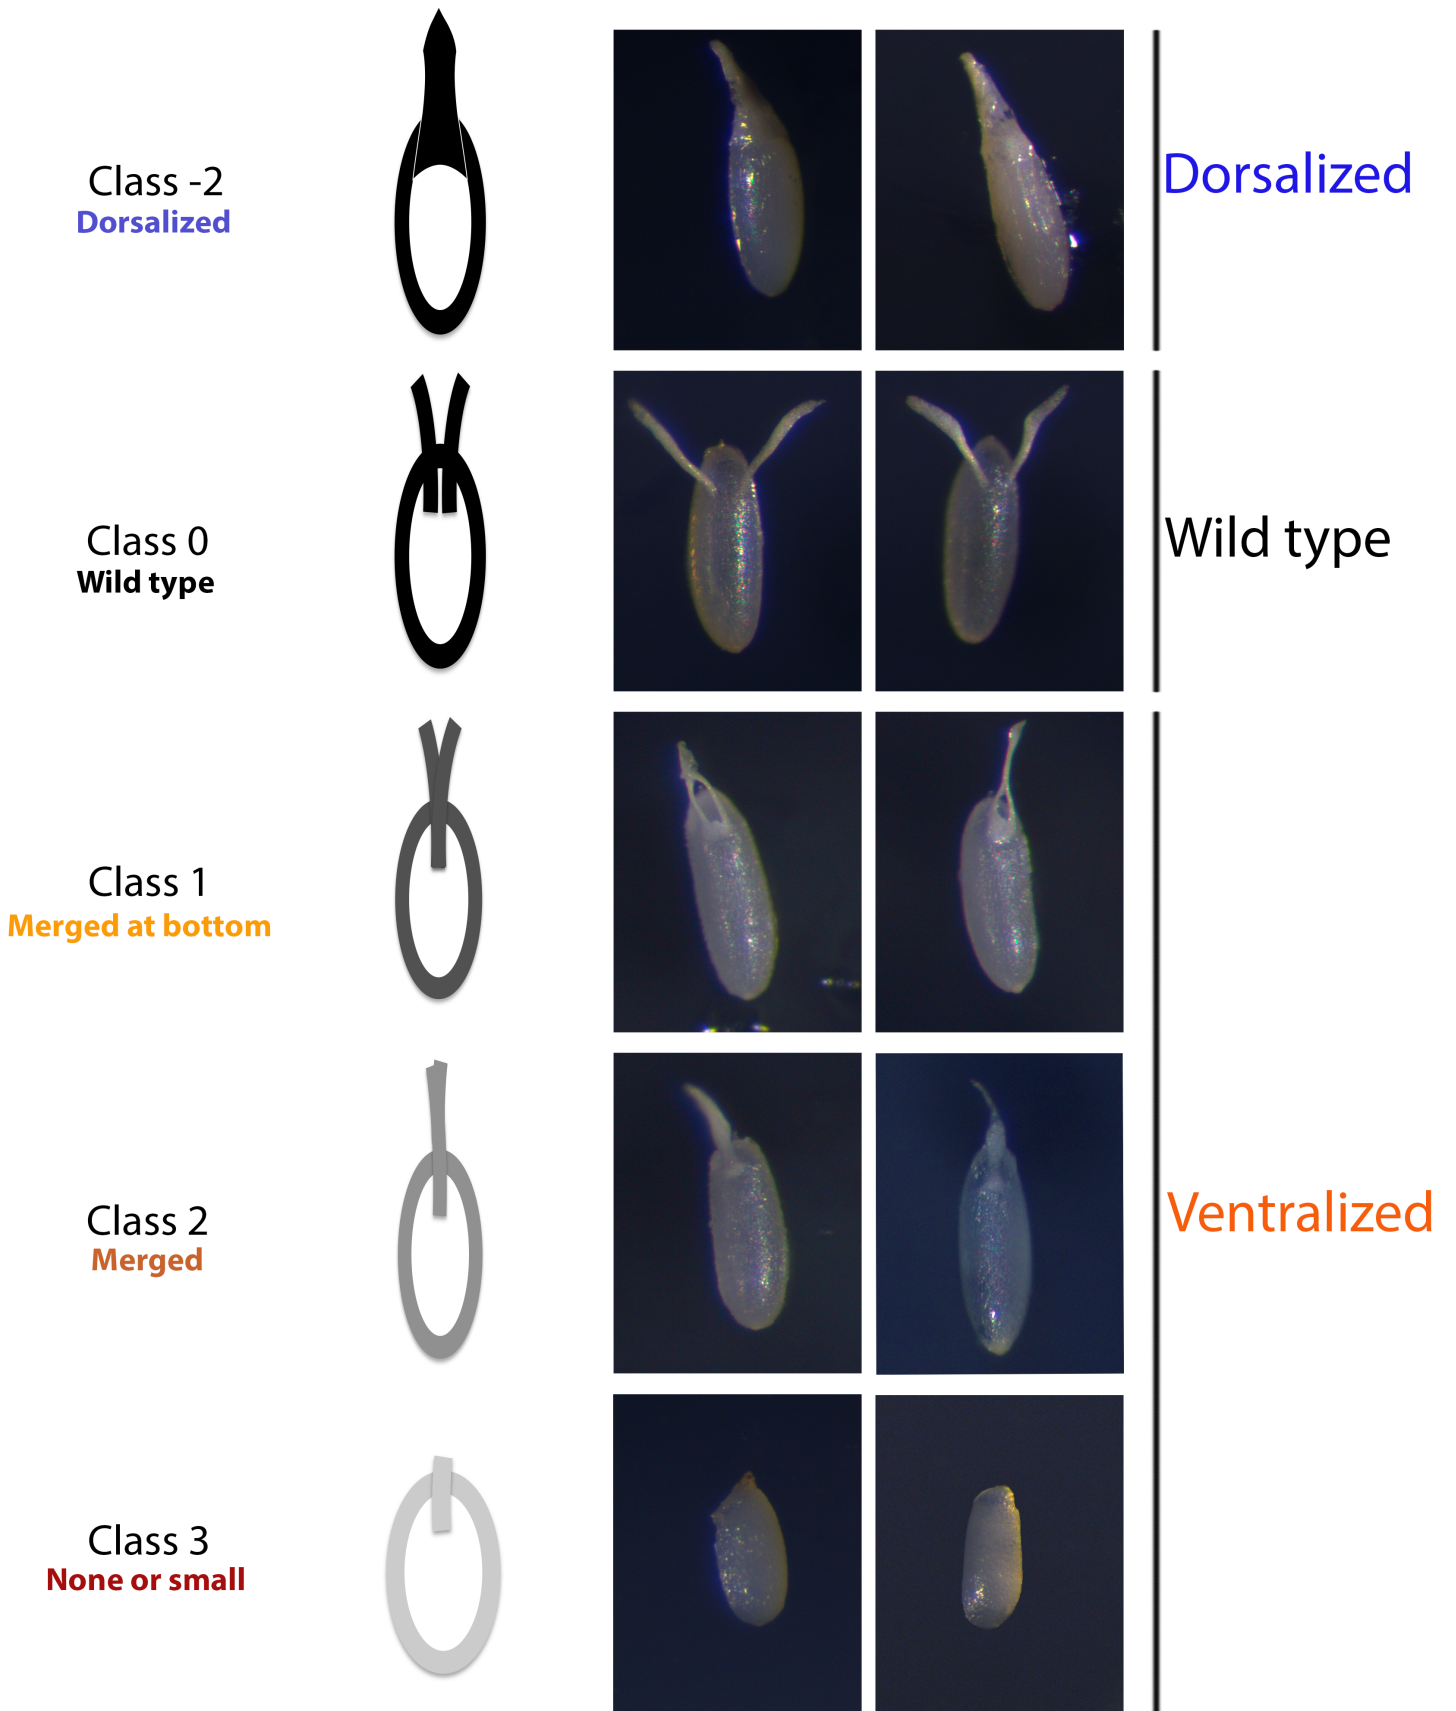

### S11 Figure. *gurken* mRNA localization defects

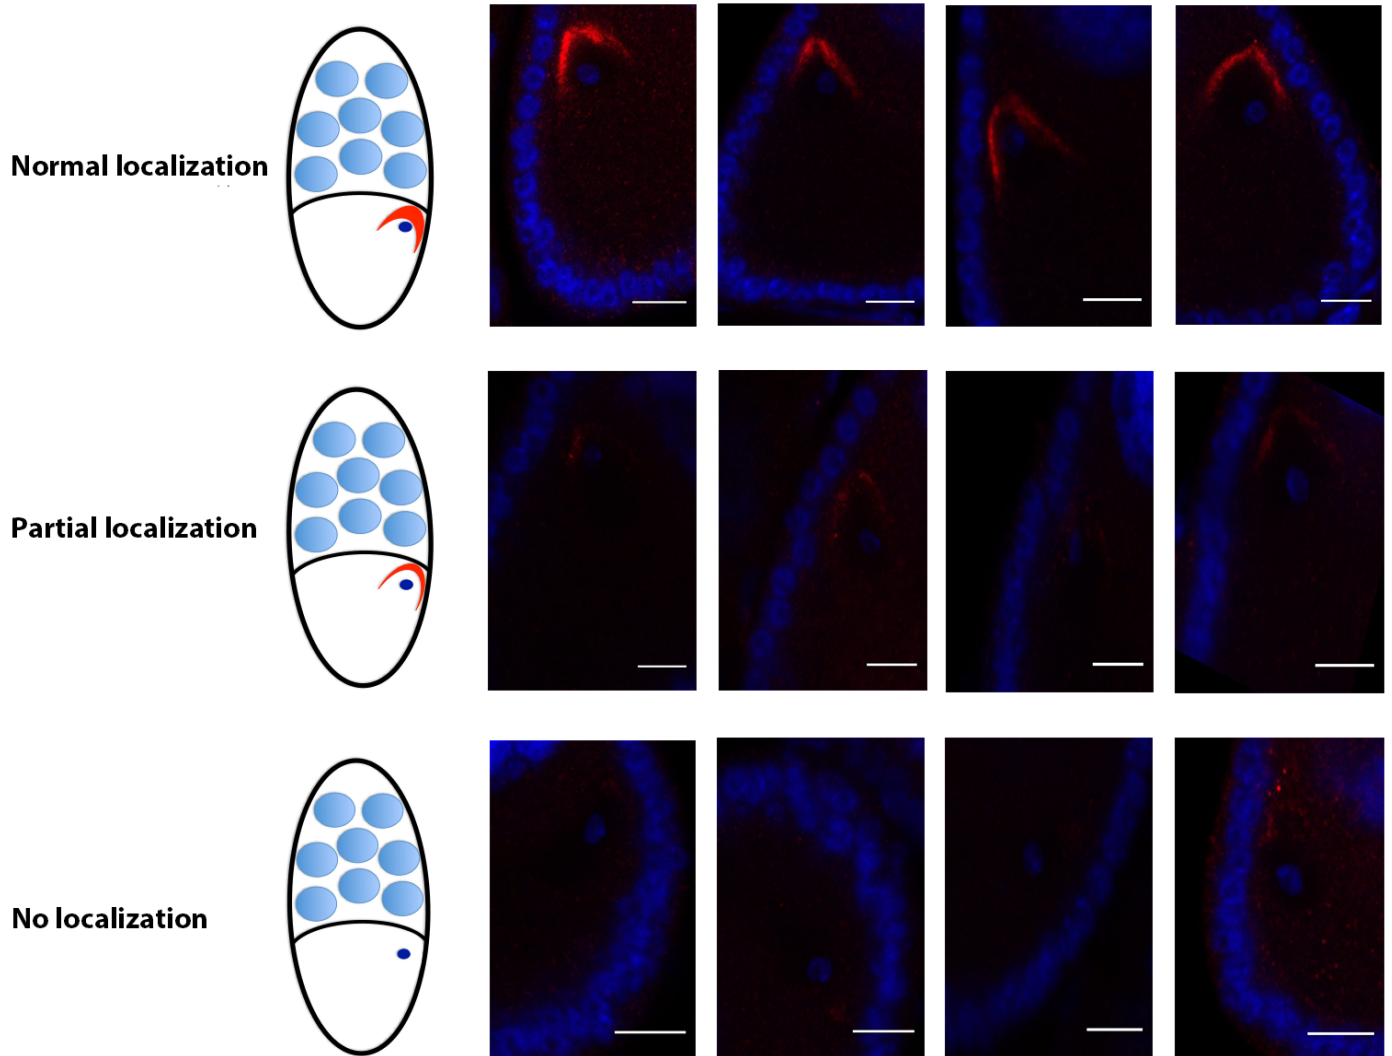

**S12 Figure. Deletion of first intron does not impair expression of *gurken* mRNA**

*gurken* mRNA expression levels

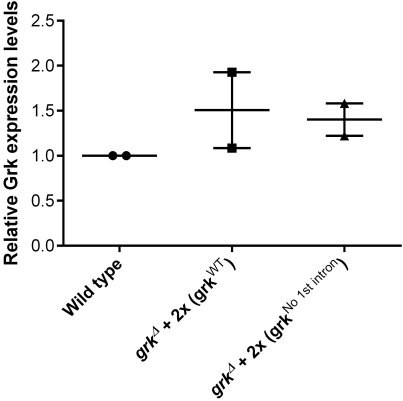

**S13 Figure. Depletion of salsa does not impair the normal morphology of the oocyte karyosome (chromosomes)**

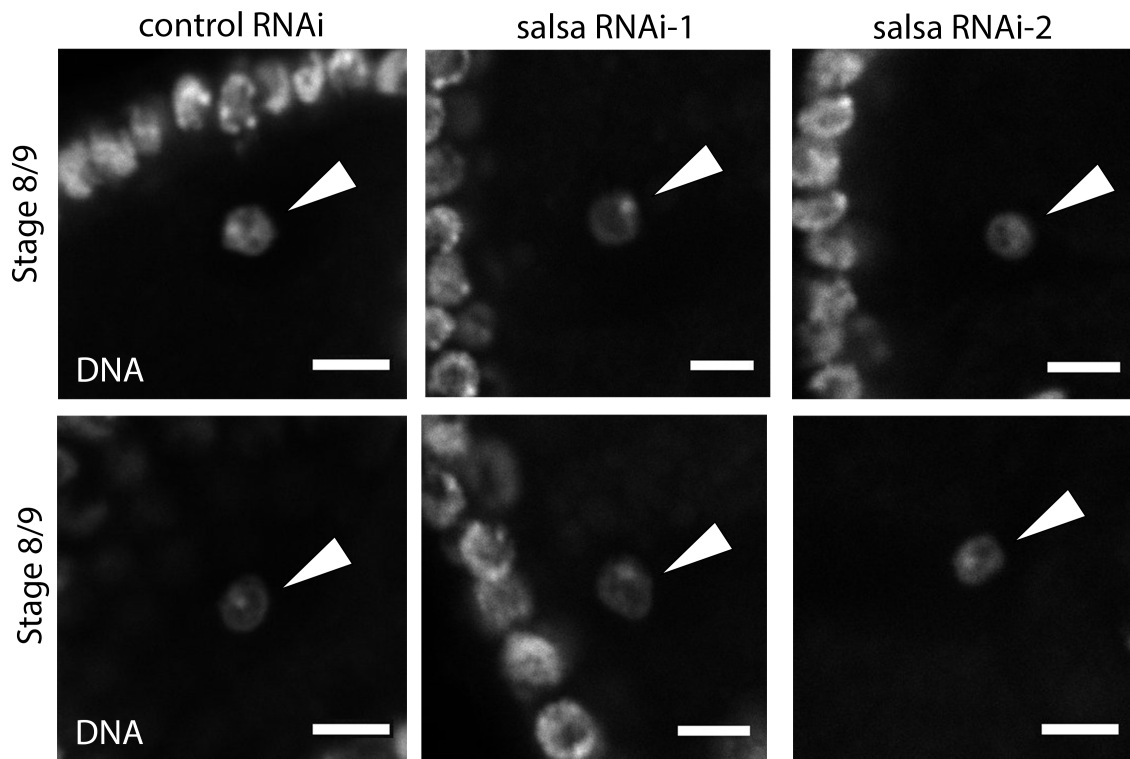

# S14 Figure. Depletion of Salsa does not impair alternative splicing of ovarian tumor (otu)

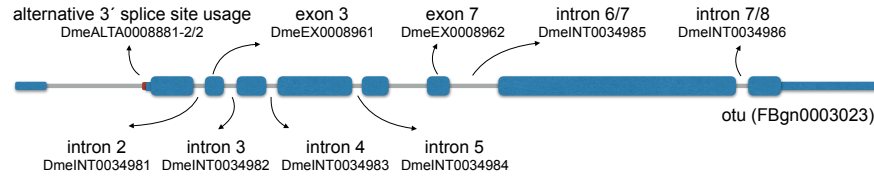

$\Delta\text{PSI}_{\text{beta}}=0.06, P_{\text{diff}}=0.90$

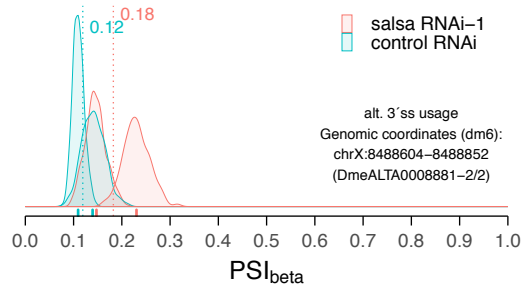

$\Delta\text{PIR}_{\text{beta}}=0.00, P_{\text{diff}}=0.68$

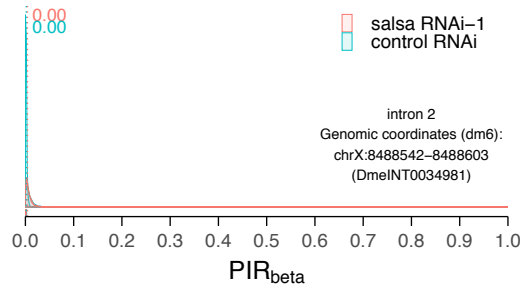

$\Delta\text{PIR}_{\text{beta}}=0.00, P_{\text{diff}}=0.63$

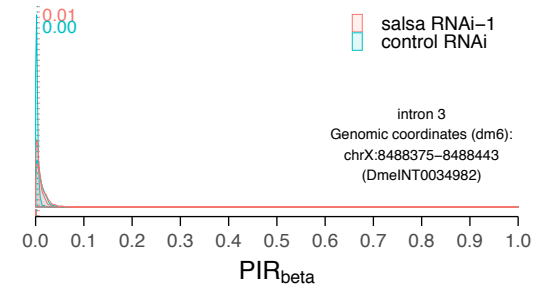

$\Delta\text{PSI}_{\text{beta}}=0.00, P_{\text{diff}}=0.62$

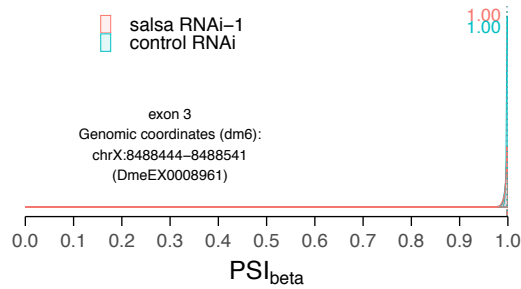

$\Delta\text{PIR}_{\text{beta}}=0.01, P_{\text{diff}}=0.68$

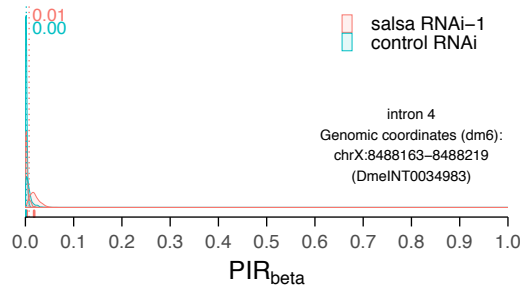

$\Delta\text{PIR}_{\text{beta}}=0.00, P_{\text{diff}}=0.73$

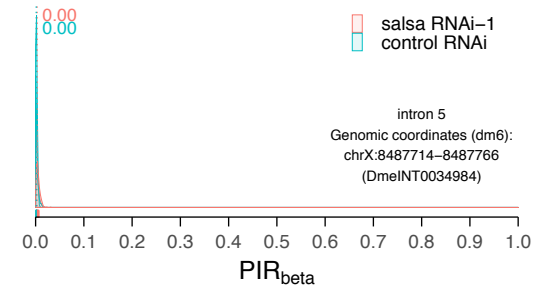

$\Delta\text{PIR}_{\text{beta}}=0.02, P_{\text{diff}}=0.94$

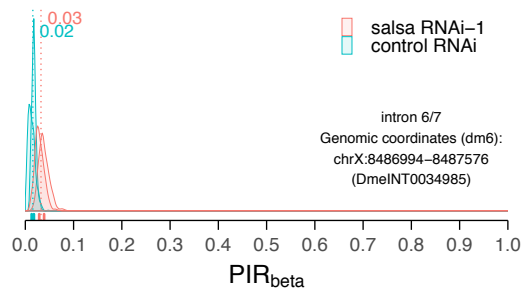

$\Delta\text{PSI}_{\text{beta}}=0.05, P_{\text{diff}}=0.99$

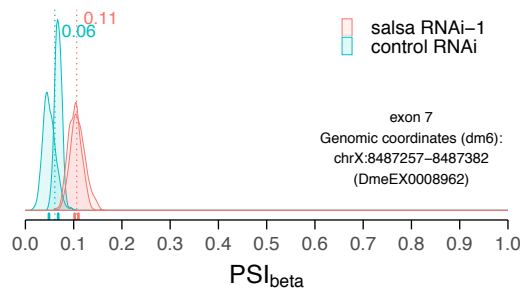

$\Delta\text{PIR}_{\text{beta}}=0.00, P_{\text{diff}}=0.70$

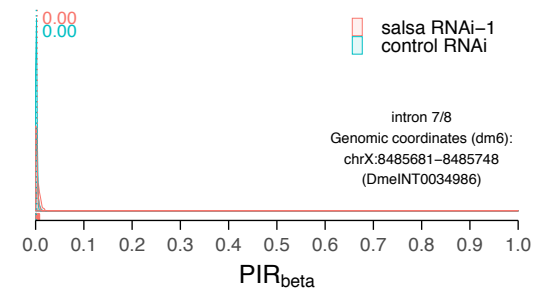

**S3 Table. List of primers**

| <b>Complete list of primers</b>        |                                                                             |
|----------------------------------------|-----------------------------------------------------------------------------|
| <b>Primer name</b>                     | <b>Primer sequence</b>                                                      |
| Actin qRT Forward                      | TGGATACTCCTCCCGACACA                                                        |
| Actin qRT Reverse                      | AGTCTTTCGGTTTGGTGTCTCT                                                      |
| GAPDH qRT Forward                      | CGGCCATAGCGAAAATCGTG                                                        |
| GAPDH qRT Reverse                      | TTCTCGTGCGTCTCGTTGAT                                                        |
| Gurken qRT Forward                     | GCGCGCAACAAGACCTAAA                                                         |
| Gurken qRT Reverse                     | GTTAATCTAAAGAGCAGCAAGCG                                                     |
| Gurken First Intron qRT Forward        | GCGTTCGTGCGACAGAAAATG                                                       |
| Gurken First Intron qRT Reverse        | GGGGTCTAAACGATCGAGGG                                                        |
| Gurken Second Intron qRT Forward       | AAGTTGCCGCACTAAAACTGA                                                       |
| Gurken Second Intron qRT Reverse       | TGTGCTGATGCTGCACAATTT                                                       |
| Gurken Third Intron qRT Forward        | TGGAACGGATGGAACCTAACGA                                                      |
| Gurken Third Intron qRT Reverse        | CGCTGTTGGAGGCGAATAGA                                                        |
| Salsa qRT Forward                      | TATCGAAGATGCCGTCAGCC                                                        |
| Salsa qRT Reverse                      | CCACTTCGACAACGGCAAAG                                                        |
| Salsa_attB1_Fwd                        | GGGGACAAGTTTGTACAAAAAAGCAGGCTTCAT<br>GAAGCGAAGAAGTCAAACCTAG                 |
| Salsa_attB2_Rev (stop)                 | GGGGACCACTTTTGTACAAGAAAGCTGGGTCCTA<br>CTAAGACTCTTCAGCTGGAGC                 |
| Salsa_attB2_Rev (without Stop)         | GGGGACCACTTTTGTACAAGAAAGCTGGGTCAG<br>ACTCTTCAGCTGGAGCC                      |
| Salsa_RNAi -1- TS                      | ctagcagtCGCTTGGATATGGACGATCTAtagttatattc<br>aagcataTAGATCGTCCATATCCAAGCGgcg |
| Salsa_RNAi -1 - BS                     | aattcgcCGCTTGGATATGGACGATCTAtatgcttgaata<br>taactaTAGATCGTCCATATCCAAGCGactg |
| Salsa_RNAi -3- TS                      | ctagcagtCCACGATTATCTCCTACGCAAtagttatattca<br>agcataTTGCGTAGGAGATAATCGTGGgcg |
| Salsa_RNAi -3 - BS                     | aattcgcCCACGATTATCTCCTACGCAAtatgcttgaatat<br>aactaTTGCGTAGGAGATAATCGTGGactg |
| pVALIUM22- Fw                          | GGTGATAGAGCCTGAACCAG                                                        |
| pVALIUM22- Rev                         | TAATCGTGTGTGATGCCTACC                                                       |
| Unspliced GRK, exon1-intron 1: forward | TATAGCAGCTCCAGTACGTC                                                        |
| Unspliced GRK, exon1-intron 1: reverse | CTACACACTTGCATCTCCTTG                                                       |
| Unspliced GRK, exon1-intron 1: probe   | TTGTTTCGTGTGTGTGCGTTCGTG                                                    |



**S4 Table. Primer efficiency and regression curve (for RT-qPCR)**

| <b>No.</b> | <b>Name of primer</b> | <b>Efficiency</b> | <b>Regression curve</b> |
|------------|-----------------------|-------------------|-------------------------|
| 1          | Actin                 | 108               | 0.994                   |
| 2          | GAPDH                 | 108.9             | 0.992                   |
| 3          | Gurken total          | 107.1             | 0.981                   |
| 4          | Gurken- First intron  | 109.9             | 0.98                    |
| 5          | Gurken- Second intron | 105.9             | 0.97                    |
| 6          | Gurken- Third intron  | 99                | 0.98                    |
| 7          | Salsa                 | 108               | 0.98                    |
| 8          | eIF4E-total           | 108.1             | 0.99                    |
| 9          | eIF4E-RB              | 108.6             | 0.99                    |
| 10         | eIF4E-RC              | 109.7             | 0.99                    |
