# Supplementary material
Source: HighWire-hosted journal article supplement (doi:10.1101/rna.077446.120)
Supplement: Supplemental_Legends.docx [file Supplemental_Legends.docx]

**Supplementary Figure 1. *Drosophila* Salsa physically interacts with spliceosome NineTeen Complex (NTC). (A)** Endogenous NTC proteins Fandango and Prp19 were efficiently co-immunoprecipitated by Salsa-Myc in an RNA-independent manner. Co-immunoprecipitation from total protein extracts from *Drosophila* Schneider 2 (S2) cells expressing a Myc-tagged Salsa (Salsa-Myc; N-terminal tag) and using dynabeads coated with an anti-Myc antibody. Protein extracts from *Drosophila* S2 cells transfected with an empty plasmid were used as negative control. Lysate were immunoprecipitated with (+) or without (-) RNase treatment.

**Supplementary Figure 2. The most common form of alternative splicing defects after Salsa depletion is increased levels of intron retention (IR). (A)** Violin plot of distribution and **(B)** proportion of positive and negative differences of mean PIR for intron retention (IR, 14504 events) and PSI (percent spliced-in (Wang et al. 2008) for exon skipping (EX, 13627 events) and alternative splice site usage (AltSS, 8385 events) values in Salsa-depleted (*salsa* RNAi-1) samples compared to control samples (mCherry RNAi) per type of alternative splicing. PIR/PSI = PIR/PSIsalsa RNAi – PIR/PSIcontrol. **(C)** Volcano plot for beta distribution-based differential alternative splicing analysis per type of alternative splicing, with differences in inclusion levels between Salsa-depleted and control samples (PIR/PSIbeta = PIR/PSIsalsa RNAi – PIR/PSIcontrol) in the x-axis and probability of differential splicing (-log10(1+ - Pdiff)) in the y-axis, with 1+ = 1.001 used to avoid infinite values when Pdiff = 1. **(D)** Violin plot of distribution and **(E)** proportion of positive and negative differences of beta distribution-based PIR/PSIbeta values per type of alternative splicing. **(B and E)** Error bars in proportion bar plots reflect 95% confidence intervals of a proportion test against the null hypothesis that the proportion of positive differences is 0.5 (dashed vertical line).

**Supplementary Figure 3. A subset of introns shows increased levels of retention (IR) upon Salsa depletion. Salsa is required for splicing of the first intron of *tra2*. (A)** Scatterplot comparing PIRbeta values in Salsa-depleted and control samples, with intron groups highlighted/labeled as in Fig. 1A. **(B)** Increased retention of the first intron (DmeINT0037630) of sex-determining gene *transformer 2* (*tra2*) upon Salsa depletion (*salsa* RNAi-1), when compared to control conditions (mCherry RNAi).Diagram of simplified *tra2* gene structure with exons (blue) and introns (gray) anddensity plots (smoothed histograms) reflecting points emitted from beta distributions used to modelretention of the first intron of *tra2* for each sample and PIRbeta estimates for Salsa-depleted and control conditions (dashed vertical lines). Rug plots below the density curves reflect PIR values per sample. Event identifier and genomic coordinates for the first intron of *tra2* are part of the VAST-DB dm6 annotation (Tapial et al. 2017).

**Supplementary Figure 4.** **First introns show a bias for increased intron retention after Salsa depletion.** **(A)** Proportion of first (left) and all other introns (right) that are part of each of the differential retention classes defined, showing increased proportion of *Affected* introns amongst first introns. **(B)** Proportion of first (white) and increasing rank (gradient of gray shades) of introns within each intron class, considering the subset on introns up to the 10th position in the transcript.

**Supplementary Figure 5. Intronic features per intron position when splicing is affected by Salsa depletion.** Violin plots and boxplots (highlighting the median, 25th and 75th percentiles per intron class) summarizing distributions of observations (each point refers to one intron) considering, from left to right, 1st to 5th introns of: **(A)** log10 of intron length (nt); **(B)** log10 of distance (nt) between intron start and the transcript transcription start site (TSS); **(C)** Maximum entropy(MaxEnt) scores (Yeo and Burge 2004) for estimation of 3´ splice site efficiency, obtained with MATT (Gohr and Irimia 2019).

**Supplementary Figure 6. No obvious 5´splice site and GC content bias in introns affected by Salsa depletion.** **(A** to **C)** Violin plots and boxplots (highlighting the median, 25th and 75th percentiles per intron class) summarizing distributions of observations (each point refers to one intron) for **(A)** Maximum entropy (MaxEnt) scores for estimation of 5´ splice site efficiency, based on (Yeo and Burge 2004) and % GC content for **(B)** all and **(C)** first introns. Comparison of metrics was performed with *Affected* as the reference: ns non-significant (Wilcoxon rank-sum test with continuity correction).Intronic features obtained with MATT (Gohr and Irimia 2019).

**Supplementary Figure 7. Salsa regulates the expression levels of a very small number of genes. Expression of the nonsense-mediated decay pathway genes is unaffected.** Volcano plot for differential gene expression analysis upon Salsa depletion (*salsa* RNAi-1), when compared to control conditions (mCherry RNAi). Each point indicates one gene considered in the analysis. **(A)** Significantly differentially expressed genes (B-statistic > 0) are highlighted in red, while *salsa* (*CG31368*) is highlighted in black as a positive control. Nonsense-mediated decay genes *Upf1* (FBgn0030354), *Upf2* (FBgn0029992), *Upf3* (FBgn0034923), *Smg5* (FBgn0019890), *Smg1/nonC* (FBgn0263968) and *Smg6* (FBgn0039260) (Gatfield et al. 2003) are highlighted in blue. **(B** to **G)** Barplots with expression levels of nonsense-mediated decay genes in corrected-for-mappability reads per kilobase and million mapped reads (cRPKM, (Labbe et al. 2012).

**Supplementary Figure 8. Genes whose expression levels were affected by Salsa depletion show no detectable changes in alternative splicing.** Diagram of simplified gene structures with exons (blue with alternative splice sites highlighted in red/pink), introns (gray) anddensity plots (smoothed histograms) reflecting points emitted from beta distributions used to modelinclusion levels for each sample and PIRbeta estimates for Salsa-depleted (*salsa* RNAi-1) and control conditions (mCherry RNAi) for: **(A)** *Drat* alternative usage of a 5´ (left panel) and a 3´(middle) splice site and intron 2 retention (right panel); **(B)** *Cyp4p2* two alternative 3´ splice site usage events ; **(C)** *Ilp6* alternative 5´ splice site usage Dashed vertical lines indicate PIRbeta estimates for salsa-depleted and control conditions and rug plots below the density curves reflect PIR values per sample. Event identifiers and genomic coordinates of the respective alternative sequences are part of the VAST-DB dm6 annotation (Tapial et al. 2017).

**Supplementary Figure 9. Depletion of Salsa impairs splicing of the first intron of *gurken* mRNA without eliciting a significant mRNA degradation. (A)** RT-qPCR analysis showed a significant reduction of *salsa* mRNA levels in ovaries and in embryos depleted for Salsa (*salsa* RNAi-2) when compared to control conditions (mCherry RNAi). **(B)** RT-qPCR analysis showed no significant reduction of *gurken* mRNA levels in ovaries and in embryos depleted for Salsa (*salsa* RNAi-2). **(C)** RT-qPCR analysis using intron-exon primers showed a significant retention of the first intron of *gurken* mRNA, but not of the second and third introns, in ovaries and in unfertilized eggs/ embryos depleted for Salsa (*salsa* RNAi-2). For all panels, relative normalized expression corresponds to values normalized with two distinct reference genes (*β-actin* and *GAPDH*) and relative to negative control (mCherry RNAi). At least three biological replicates were used for ovaries, whereas two biological replicates were used for embryos. mCherry RNAi was used as a control RNAi from all panels. Error bars indicate standard deviation. Ovaries results are the same shown in Fig.4A.

**Supplementary Figure 10. Classes of eggshell dorsal appendages defects.** For quantification of eggshell dorsal appendages defects, the observed phenotypes were categorized in six different phenotypic classes based on the eggshell dorsal appendages. Class 0 corresponds to wild-type eggshell dorsal appendages (WT). Eggshell ventralization (V) of the eggshells corresponds to classes 1 to 3. Eggshell dorsalization (D) corresponds to classes -1 and -2. Class 0 (wild-type dorsal appendages): two individualized dorsal appendages); class 1: dorsal appendages only fused at bottom; class 2: fused dorsal appendages - spindle phenotype; and class 3: short eggs (dumpless-like phenotype) without or with extremely short dorsal appendages. Class -1: corresponds to short eggs with dorsalized appendages; class -2: corresponds to a broad and thick crown of appendage material or a broad/fused appendage that covers the entire width of the eggshell.

**Supplementary Figure 11. Classes of *gurken* mRNA dorsal-anterior localization defects.** Dorsal-anterior localization of *gurken* mRNA in stage 8/9 egg chambers was categorized in three phenotypic classes: "normal localization", "partial localization" and "no localization". DNA (Blue) and *gurken* mRNA (red). Scale bar 10μm.

**Supplementary Figure 12. Deletion of the first intron does not impair expression levels of *gurken* mRNA.** Genomic constructs of *gurken*, with its own endogenous *gurken* promoter and integrated in the same attP-site, but with (*grk*WT) or without the transcript first intron (*grk*no 1st intron), showed identical expression levels of *gurken* mRNA. Genomic constructs of *gurken* (two copies) were in *grkdeltaFRT* mutant background. Real-time qPCR analysis of *gurken* mRNA levels was done using primers for the first exon of *gurken* transcript. Relative normalized expression corresponds to values normalized with two distinct reference genes (*β-actin* and *GAPDH*) and relative to wild type. Two biological replicates were used for all datasets. Error bars indicate standard deviation.

**Supplementary Figure 13. Depletion of Salsa does not impair the normal morphology of the oocyte karyosome (chromosomes).** During mid-oogenesis the oocyte chromatin is condensed into a structure called karyosome (arrowhead). Defects in karyosome morphology are indicative of the accumulation of DNA damage and abnormal activation of the meiotic checkpoint (Abdu et al. 2002). Germ line depletion of Salsa (*salsa* RNAi-2) did no impair the correct morphology of the oocyte karyosome. mCherry RNAi was used as a negative control. DNA was visualized with DAPI staining (grey). Arrowheads indicate the oocyte karyosome. Scale bars 5 µm.

**Supplementary Figure 14. Depletion of Salsa does not impair alternative splicing of *ovarian tumor* (*otu*).** Diagram of simplified *otu* gene structure with exons (blue) and introns (gray) anddensity plots (smoothed histograms) reflecting points emitted from beta distributions used to modelinclusion levels for alternative splicing events in *otu* gene. For each sample, density plots reflect PIRbeta estimates. Mild differences in inclusion levels could be detected in some cases between control (mCherry RNAi) and Salsa-depleted (*salsa* RNAi-1), yet none was significant under our criteria for differential splicing (Pdiff  0.9 and |PIRbeta| > 0.10). Dashed vertical lines indicate PIRbeta estimates for Salsa-depleted and control conditions and rug plots below the density curves reflect PIR values per sample. Event identifiers and genomic coordinates of the respective alternative sequences are part of the VAST-DB dm6 annotation (Tapial et al. 2017).

**TABLES**

**Supplementary Table 1. Differentially retained introns after Salsa depletion.** Results from beta distribution-based differential intron retention analysis. Intron description (FlyBase gene name, *vast-tools’* event identifier and Ensembl transcript ID, as well as intron’s dm6 genomic coordinates, strand, length and order in transcript) followed by beta distribution-based inclusion levels for each sample, PIRbeta for the two conditions (Salsa depletion (*salsa* RNAi-1) and control samples (mCherry RNAi)), the difference between these and the probability of differential intron retention. Final columns refer to the predicted impact of intron retention in the protein coding and the class the intron was assigned to following this analysis.

**Supplementary Table 2. Differentially expressed genes after Salsa depletion.** Results from differential gene expression analysis performed with the *limma* R package (Ritchie et al. 2015). FlyBase gene identifiers (ID and name) are followed by the summary statistics of genes considered significantly differentially expressed: average expression across samples in log2-counts per million (logCPM), log2 fold-change in expression between Salsa depletion (*salsa* RNAi-1) and control conditions (mCherry RNAi), moderated t-statistic and respective nominal p-value and Benjamini-Hochberg-adjusted p-value, and empirical Bayes statistic (B-statistic or log-odds ratio of the gene being differentially expressed).

**Supplementary Table 3. List of primers.**

**Supplementary Table 4. Primer efficiency and regression curve (for RT-qPCR).**
