# Supplementary material
Source: HighWire-hosted journal article supplement (doi:10.1101/rna.077446.120)
Supplement: Supplemental_Table_1_.xlsx [file Supplemental_Table_1_.xlsx]

## Sheet: SuppTable1
FlyBase gene name	vast-tools Event	Ensembl Transcript ID	Genomic coordinates (dm6)	Strand	Intron length (nt)	Intron order	PIR (Salsa rep1)	PIR (Salsa rep2)	PIR (Ctrl rep1)	PIR (Ctrl rep2)	PIR (Salsa)	PIR (Ctrl)	dPIR (Salsa-Ctrl)	Pdiff	Predicted coding impact	Class
CaMKI	DmeINT0017610	FBtr0089067	chr4:446752-446820	+	69	1	0.258291142572129	0.272977062140293	0.125857144877508	0.07221485951903	0.26304802206266	0.0972500628882282	0.165797959174431	0.997	5' UTR	Affected
CG11455	DmeINT0002517	FBtr0078117	chr2L:155430-155566	+	137	1	0.490128884661573	0.444304485375944	0.40545759725765	0.318557072830227	0.46614627464414	0.359611207613811	0.106535067030329	0.982	5' UTR	Affected
Su(var)205	DmeINT0027843	FBtr0079635	chr2L:8210862-8210978	-	117	1	0.333754507805651	0.388988045551534	0.0719633827145237	0.0594436003775834	0.362911004856392	0.065338462394554	0.297572542461838	1	5' UTR	Affected
CG4709	DmeINT0012643	FBtr0079884	chr2L:9954535-9954595	+	61	1	0.197652219652234	0.185633565695434	0.0376787984524414	0.0251588285795337	0.192933183432485	0.0309894889873443	0.161943694445141	0.998	ORF disruption upon sequence inclusion (1st CDS intron)	Affected low PIR
CG15362	DmeINT0005331	FBtr0077814	chr2L:1981584-1981641	+	58	1	0.155914032739343	0.162907269002116	0.0562807957335519	0.0488952684488002	0.160872227129749	0.0519760285993682	0.108896198530381	0.994	ORF disruption upon sequence inclusion (1st CDS intron)	Affected
mxt	DmeINT0034405	FBtr0077409	chr2L:4845159-4845253	-	95	3	0.219161140047448	0.325035129946844	0.113538235271144	0.152905555705856	0.273850841352459	0.133968050023067	0.139882791329392	0.95	ORF disruption upon sequence inclusion	Affected
crol	DmeINT0030845	FBtr0080261	chr2L:11803675-11803784	-	110	3	0.187337481276223	0.251710540593066	0.0894734663732937	0.0622875376945637	0.225556632633369	0.0828362557017696	0.142720376931599	0.994	5' UTR	Affected
hang	DmeINT0032421	FBtr0074276	chrX:16436505-16436587	+	83	7	0.831680884137561	0.834300589767391	0.932586622586737	0.978831834999283	0.833513300983074	0.946294752545862	-0.112781451562788	1	Alternative protein isoforms	Less Retained
Pmp70	DmeINT0025286	FBtr0074795	chrX:19751138-19751347	+	210	1	0.22884154794037	0.334492234732033	0.0404095720776482	0.1715430761243	0.284573269833004	0.0871022983934292	0.197470971439574	0.974	5' UTR	Affected
Ranbp16	DmeINT0025860	FBtr0074162	chrX:15928931-15929340	-	410	15	0.145135897145842	0.182770437129963	0.0301553296251398	0.0440907658823945	0.165406829186617	0.0362405808808183	0.129166248305799	0.995	Alternative protein isoforms	Affected low PIR
Seipin	DmeINT0027161	FBtr0070442	chrX:2620594-2620824	+	231	1	0.11347237877636	0.119819225840552	0.00845238583520084	0.0058252068092827	0.112766871183668	0.00692513690361725	0.105841734280051	0.994	ORF disruption upon sequence inclusion (1st CDS intron)	Affected low PIR
AMPKalpha	DmeINT0000185	FBtr0070216	chrX:1375756-1375861	+	106	1	0.249980070169641	0.237772318089542	0.0753167257600716	0.0732180020165716	0.24493490426588	0.0753105957483632	0.169624308517517	1	5' UTR	Affected
Su(var)2-10	DmeINT0027833	FBtr0088578	chr2R:9119048-9119752	+	705	7	0.447332474134667	0.451741901079788	0.652344151636016	0.563802279917908	0.451343265412296	0.624260893239121	-0.172917627826826	0.994	ORF disruption upon sequence inclusion	Less Retained
Su(var)2-10	DmeINT0027834	FBtr0088578	chr2R:9119832-9119910	+	79	8	0.476518959587229	0.480252629433191	0.656393362833818	0.584094891893416	0.479198203987092	0.632360104324607	-0.153161900337516	0.997	Alternative protein isoforms	Less Retained
tra2	DmeINT0037630	FBtr0089617	chr2R:14604124-14604196	-	73	1	0.458381225876872	0.590497355653367	0.0673627048120031	0.159910443990552	0.531039987949006	0.101227609876917	0.429812378072089	0.999	5' UTR	Affected
CG7745	DmeINT0014974	FBtr0088119	chr2R:11308098-11308155	+	58	1	0.0686812592354381	0.222835247857889	0.0144026052260659	0.0476117280844984	0.144566098826646	0.0252310847128536	0.119335014113792	0.907	Alternative protein isoforms	Affected low PIR
CG1620	DmeINT0005723	FBtr0088983	chr2R:7494798-7494865	-	68	2	0.154315631829743	0.206526343925551	0.064867310224591	0.0991635220439153	0.18283188422405	0.0780591551170579	0.104772729106992	0.992	Alternative protein isoforms	Affected
CG3831	DmeINT0010649	FBtr0071993	chr2R:22940530-22940614	-	85	1	0.0770496620311494	0.1463618374071	0.00494032647186711	0.0115328978275416	0.112319866962068	0.00755240266902805	0.10476746429304	0.999	ORF disruption upon sequence inclusion (1st CDS intron)	Affected low PIR
CG30108	DmeINT0007506	FBtr0273298	chr2R:17669633-17669686	+	54	1	0.26201649968894	0.289827431993195	0.118107883550306	0.134138944169241	0.275079592402851	0.128757903082339	0.146321689320512	0.997	Alternative protein isoforms	Affected
fl(2)d	DmeINT0031909	FBtr0087647	chr2R:13821558-13823791	-	2234	1	0.145113688470338	0.236215942658607	0.0529391607096584	0.0969410672591681	0.191675507936319	0.069227806545763	0.122447701390556	0.907	ORF disruption upon sequence inclusion (1st CDS intron)	Affected
babo	DmeINT0029902	FBtr0088659	chr2R:8955859-8959106	+	3248	4	0.283512427596925	0.265773440425517	0.0732992569441215	0.0797239367848008	0.274597463993875	0.0713474813359759	0.203249982657899	0.997	ORF disruption upon sequence inclusion	Affected
TBPH	DmeINT0028040	FBtr0089626	chr2R:23861458-23862260	-	803	1	0.304693398266286	0.216464526377692	0.0893070387007078	0.182411429182011	0.257593832059148	0.135097596776378	0.12249623528277	0.913	5' UTR	Affected
qkr58E-2	DmeINT0035814	FBtr0071828	chr2R:22417637-22417692	+	56	4	0.723356961337082	0.714314177627721	0.549526714510614	0.567189600905557	0.716374574262225	0.55557941672624	0.160795157535985	0.996	3' UTR	Affected
CG6701	DmeINT0014145	FBtr0303989	chr2R:13977581-13977644	-	64	3	0.108990170698277	0.226450449960004	0.0582339333356042	0.052330208643645	0.165201976378494	0.0568405117121817	0.108361464666312	0.931	ORF disruption upon sequence inclusion	Affected
CG18659	DmeINT0006802	FBtr0088626	chr2R:9128311-9128370	-	60	3	0.168390488807708	0.240971613281923	0.0523895520569118	0.0440819488402932	0.20141556979193	0.0502588953765734	0.151156674415357	0.991	Alternative protein isoforms	Affected
Rpn13	DmeINT0026617	FBtr0087610	chr2R:13959100-13959204	-	105	3	0.29497091938819	0.326056960102024	0.181181030241602	0.163170849145583	0.3101724233523	0.172277414745299	0.137895008607001	1	Alternative protein isoforms	Affected
Git	DmeINT0020694	FBtr0088258	chr2R:10645155-10645337	-	183	1	0.141809323075418	0.223707209958234	0.0741142151105931	0.0495346160556729	0.1819878894998	0.0631078546711461	0.118880034828654	0.95	5' UTR	Affected
CG33145	DmeINT0009345	FBtr0088047	chr2R:11981757-11981823	-	67	2	0.912951174862419	0.798558621490448	0.968627444396173	0.96899951933388	0.859926821366652	0.969252669992777	-0.109325848626125	0.968	Alternative protein isoforms	Less Retained
prel	DmeINT0035609	FBtr0300293	chr2R:9424267-9424331	+	65	1	0.370462864364979	0.454825982917594	0.309466750584166	0.258866085371433	0.410115703143537	0.288599645834956	0.121516057308581	0.947	5' UTR	Affected
CG7458	DmeINT0014727	FBtr0078475	chr3L:21955860-21956379	+	520	2	0.288400853761769	0.321142392760761	0.113469449587683	0.164467031023746	0.303788792141735	0.139840188826418	0.163948603315316	0.98	ORF disruption upon sequence inclusion	Affected
mRpS6	DmeINT0033727	FBtr0073288	chr3L:4364746-4364811	+	66	2	0.114284306713745	0.17060368400728	0.0153934758344417	0.0401176476141077	0.141274108559846	0.0246258507880269	0.11664825777182	0.996	Alternative protein isoforms	Affected low PIR
RhoBTB	DmeINT0026137	FBtr0078185	chr3L:20381293-20381546	+	254	11	0.191171773786182	0.215300055442156	0.0350505981609401	0.164438359153623	0.204006588895782	0.0857214813224485	0.118285107573333	0.9	ORF disruption upon sequence inclusion	Affected
mbf1	DmeINT0033818	FBtr0075393	chr3L:16574753-16574852	+	100	1	0.267861113924248	0.312150749032694	0.0947096876679252	0.0503450165679145	0.289573597836899	0.0731834146137775	0.216390183223122	1	5' UTR	Affected
CG7407	DmeINT0014688	FBtr0078440	chr3L:21823664-21823725	+	62	1	0.0812718546333193	0.166312833523624	0.0191763919895009	0.00605414073558091	0.121838761729415	0.0118193083980904	0.110019453331325	0.999	Alternative protein isoforms	Affected low PIR
CG11504	DmeINT0002542	FBtr0085548	chr3R:29998207-29998270	+	64	1	0.333323143730724	0.35522141413731	0.197027249797983	0.185848109378644	0.343094862413777	0.192243736933181	0.150851125480595	1	5' UTR	Affected
CG1239	DmeINT0003079	FBtr0078720	chr3R:5733617-5733686	+	70	1	0.238494628953947	0.262133603840591	0.05000798669588	0.0531626825634004	0.246419421318746	0.0509501139503563	0.195469307368389	1	5' UTR	Affected
Rad17	DmeINT0025814	FBtr0082974	chr3R:14661804-14661861	-	58	3	0.11025002849359	0.187004722514825	0.0372116333961928	0.00344436629498407	0.143070080999258	0.0214197233466316	0.121650357652627	0.994	Alternative protein isoforms	Affected low PIR
CG7168	DmeINT0014476	FBtr0083608	chr3R:18225698-18225775	-	78	2	0.573425799368538	0.462626178960156	0.122290260770916	0.24693405402915	0.522265653545276	0.177409239271969	0.344856414273307	1	5' UTR	Affected
CG5902	DmeINT0013581	FBtr0084502	chr3R:23986947-23987031	+	85	1	0.184092242976752	0.209769865100128	0.0455268180745998	0.055901865128347	0.198414399760531	0.0530754106918561	0.145338989068674	0.971	5' UTR	Affected
RpL32	DmeINT0026496	FBtr0085594	chr3R:30045787-30045986	-	200	1	0.602534423709791	0.691698525272353	0.427095908391641	0.49617231759615	0.651789638757823	0.461993028290614	0.189796610467209	0.98	5' UTR	Affected
CG13850	DmeINT0004094	FBtr0084231	chr3R:22410682-22410856	-	175	1	0.134785831051457	0.0978896450391954	0.00431705412436634	0.0142176661603375	0.113838132843598	0.00779854975318307	0.106039583090415	0.992	5' UTR	Affected low PIR
CG11897	DmeINT0002741	FBtr0085386	chr3R:29158348-29158498	+	151	1	0.290288031925651	0.372743400867934	0.189981693931154	0.178388095166454	0.325250484413453	0.186820586018737	0.138429898394716	0.99	5' UTR	Affected
CG31301	DmeINT0008125	FBtr0083087	chr3R:15347153-15347208	+	56	2	0.216462553424902	0.294039738268902	0.0906746904343568	0.0780322640744855	0.255989718605333	0.0848359251289194	0.171153793476413	1	ORF disruption upon sequence inclusion	Affected
GILT2	DmeINT0020505	FBtr0084435	chr3R:23679028-23679093	+	66	1	0.138684487849915	0.114526503883472	0.00910382427762446	0.017291415144288	0.125664913250162	0.0137769368873186	0.111887976362844	1	Alternative protein isoforms	Affected low PIR
CG18428	DmeINT0006730	FBtr0084543	chr3R:24109589-24109655	+	67	1	0.56100536361111	0.545056437208336	0.304398477744456	0.366634241418073	0.55656741426152	0.331571737417374	0.224995676844146	1	Alternative protein isoforms	Affected
CG8866	DmeINT0015921	FBtr0082055	chr3R:9332167-9332538	-	372	6	0.717424543242109	0.623686715009897	0.570031177796055	0.422831121926135	0.668995965561747	0.514500741876508	0.154495223685239	0.928	Alternative protein isoforms	Affected
Prat	DmeINT0025373	FBtr0081764	chr3R:7911614-7911693	-	80	1	0.199102330065425	0.373535630306218	0.0560361110870344	0.0534917448226608	0.306449971016072	0.0522747798144046	0.254175191201667	0.989	5' UTR	Affected
CG5746	DmeINT0013435	FBtr0084631	chr3R:24347595-24347663	-	69	3	0.579106384550062	0.51640419589293	0.334468468422457	0.292772672829082	0.548927531395498	0.321435884472408	0.22749164692309	1	Alternative protein isoforms	Affected
CG5514	DmeINT0013259	FBtr0085252	chr3R:27942484-27942587	+	104	4	0.146874831495877	0.115527691915381	0.228154179073322	0.326755258031791	0.12971226440915	0.259971389296838	-0.130259124887688	0.984	3' UTR	Less Retained
pygo	DmeINT0035776	FBtr0085806	chr3R:31579886-31579952	-	67	1	0.523689312181127	0.512380834408069	0.592925698995779	0.692288967106906	0.516961136967794	0.623651159181174	-0.106690022213379	0.93	5' UTR	Less Retained
bocksbeutel	DmeINT0030141	FBtr0082105	chr3R:9589783-9589882	-	100	1	0.855101205233938	0.857770103050231	0.727610708553796	0.779238758456456	0.855554014664779	0.748128848569589	0.107425166095191	0.964	Alternative protein isoforms	Affected
CG31211	DmeINT0008047	FBtr0082479	chr3R:11951493-11951722	+	230	4	0.535104768664351	0.617241336119637	0.290033934796059	0.413469710749538	0.580031513128436	0.348217197648818	0.231814315479617	0.982	ORF disruption upon sequence inclusion	Affected
CG31211	DmeINT0008051	FBtr0082479	chr3R:11953056-11953112	+	57	8	0.298953800252749	0.351862309199944	0.180329214658034	0.250466235216345	0.320938074761538	0.212399347230906	0.108538727530633	0.918	Alternative protein isoforms	Affected
