# Supplementary material
Source: HighWire-hosted journal article supplement (doi:10.1101/rna.077446.120)
Supplement: Supplemental_Table_2_.xlsx [file Supplemental_Table_2_.xlsx]

## Sheet: SuppTable2
FlyBase gene ID	FlyBase gene name	Average expression (logCPM)	log2(fold-change)	t-statistic	p-value	adjusted p-value	B statistic
FBgn0037844	CG4570	6.03906452839456	-2.56584276905014	-9.91805109646006	6.12901132626835e-05	0.235357501763216	1.84096375324018
FBgn0033188	Drat	6.60006856763539	2.48854756888606	8.5447249510494	0.000142118167370053	0.235357501763216	1.31484877228958
FBgn0033926	Arc1	5.43123665248299	-2.62216770344523	-8.8670569347186	0.000115478351099357	0.235357501763216	1.29564775001348
FBgn0033395	Cyp4p2	5.03611978938661	2.48859946292	7.86145934859285	0.000225891612575848	0.235357501763216	0.80829869959878
FBgn0003366	sev	4.880372733571	2.46233377329948	7.31667143147638	0.000335179988389264	0.294288029805774	0.506855192559939
FBgn0044047	Ilp6	5.29839537204909	2.06356020972792	6.79776066138466	0.000499576493496758	0.394765345161138	0.298512276828948
